# Supplementary material
Source: PubMed Central journal article supplement (PMC6230313)
Supplement: NIHMS964710-supplement-supplement_1.pdf [file NIHMS964710-supplement-supplement_1.pdf]

1 **Supporting Information**

2

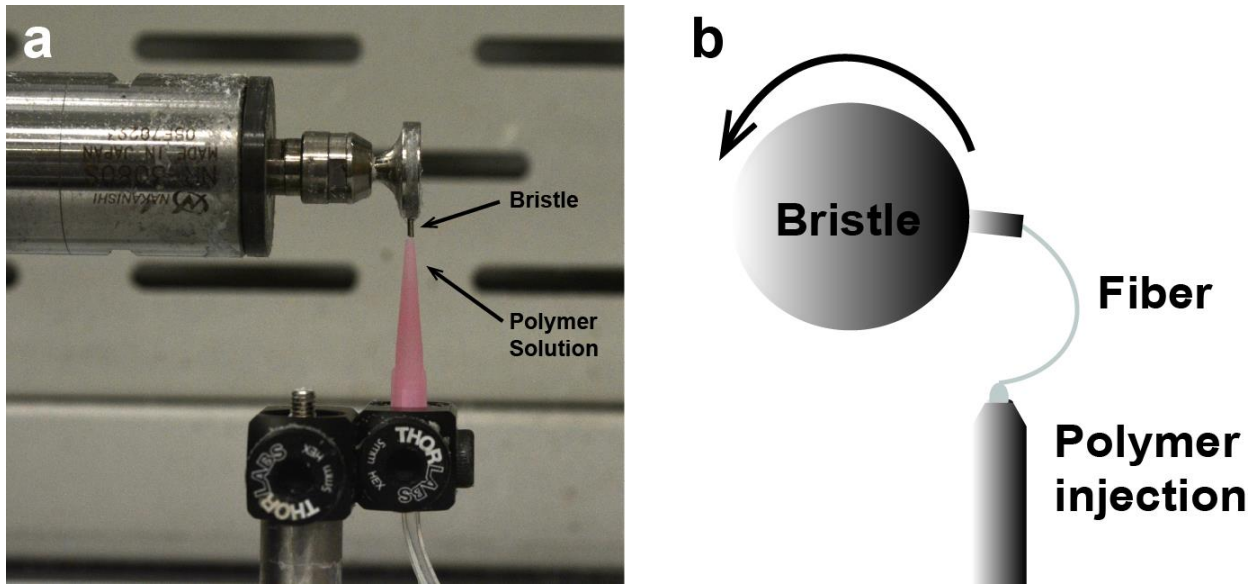

3

4 **Figure S1.** Image illustrating the pull spinning system used for nanofiber fabrication.

5

6

7

8

9

10

11

12

13

14

15

16

17

18

19

20

21

22

23

24

25

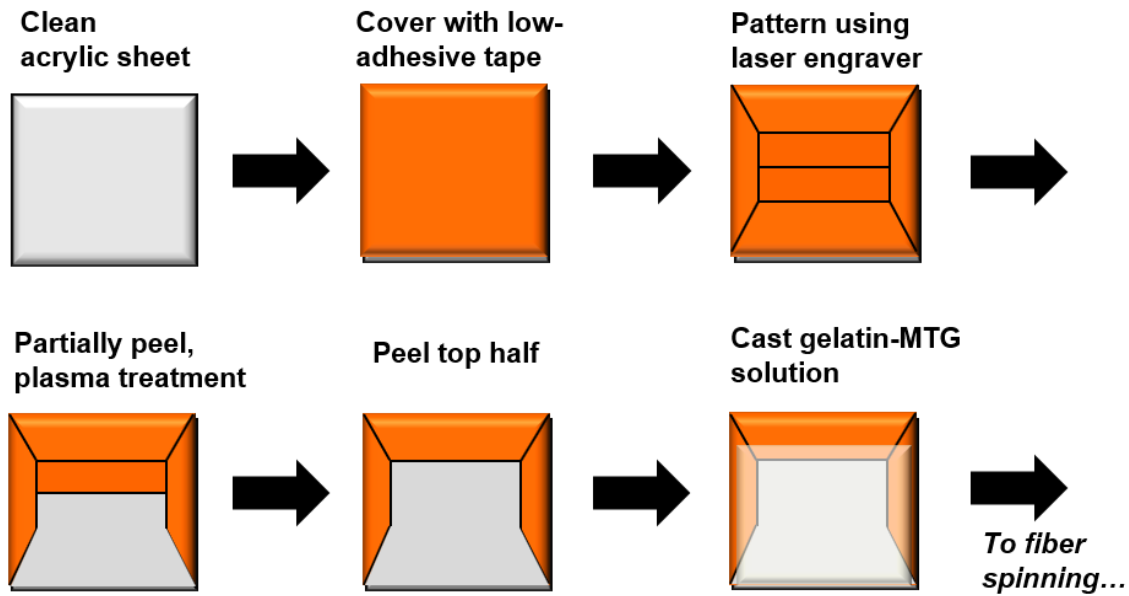

**Figure S2.** Schematic diagram showing the preparation of gelatin MPS substrates before spinning the fibers.

1  
2  
3  
4  
5  
6  
7  
8  
9  
10  
11  
12  
13  
14  
15  
16  
17  
18  
19  
20  
21  
22

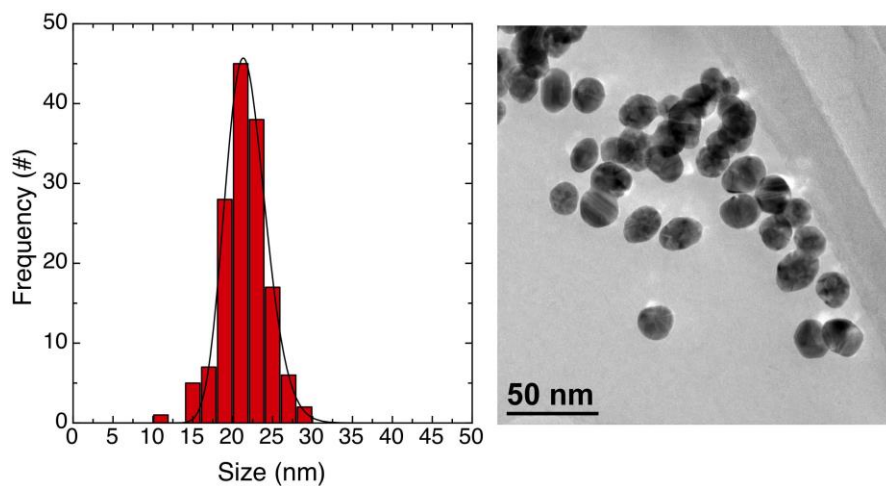

1  
2 **Figure S3.** TEM Feret size distribution for the Ag nanoparticles.  
3  
4  
5  
6  
7  
8  
9  
10  
11  
12  
13  
14  
15  
16  
17  
18  
19  
20  
21  
22  
23  
24  
25  
26  
27  
28  
29  
30  
31

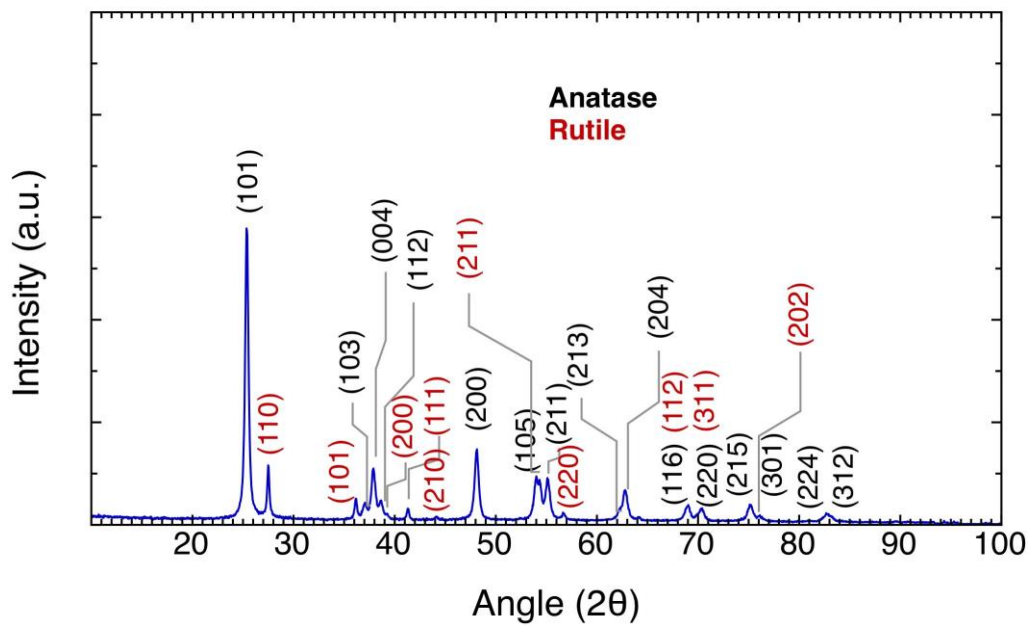

1  
2  
3  
4  
5  
6  
7  
8  
9  
10  
11  
12  
13  
14  
15  
16  
17  
18  
19

**Figure S4.** XRD Pattern for the TiO<sub>2</sub> Degussa P25.

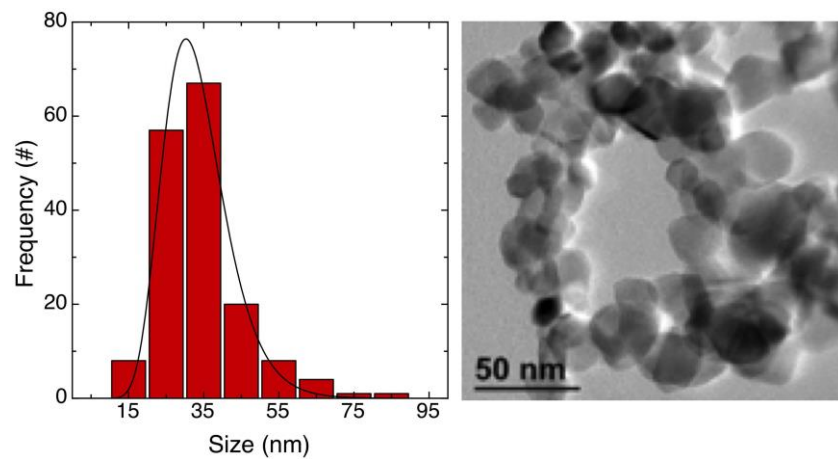

**Figure S5.** TEM Feret size distribution for the TiO<sub>2</sub> Degussa P25.

1  
2  
3  
4  
5  
6  
7  
8  
9  
10  
11  
12  
13  
14  
15  
16  
17  
18  
19  
20  
21  
22  
23  
24  
25  
26  
27  
28  
29  
30  
31  
32

1

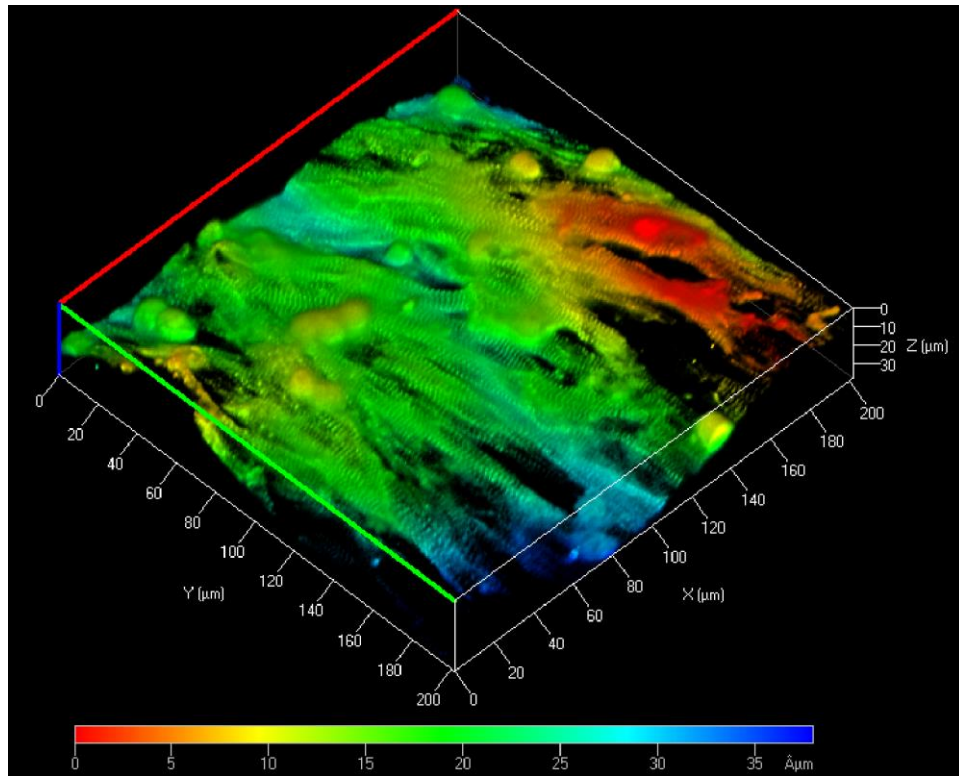

2

3 **Figure S6.** Representative 3D reconstruction image of z-stacked confocal images of NRVMs  
4 grown on PCL/PDA nanofiber scaffold with a color depth.

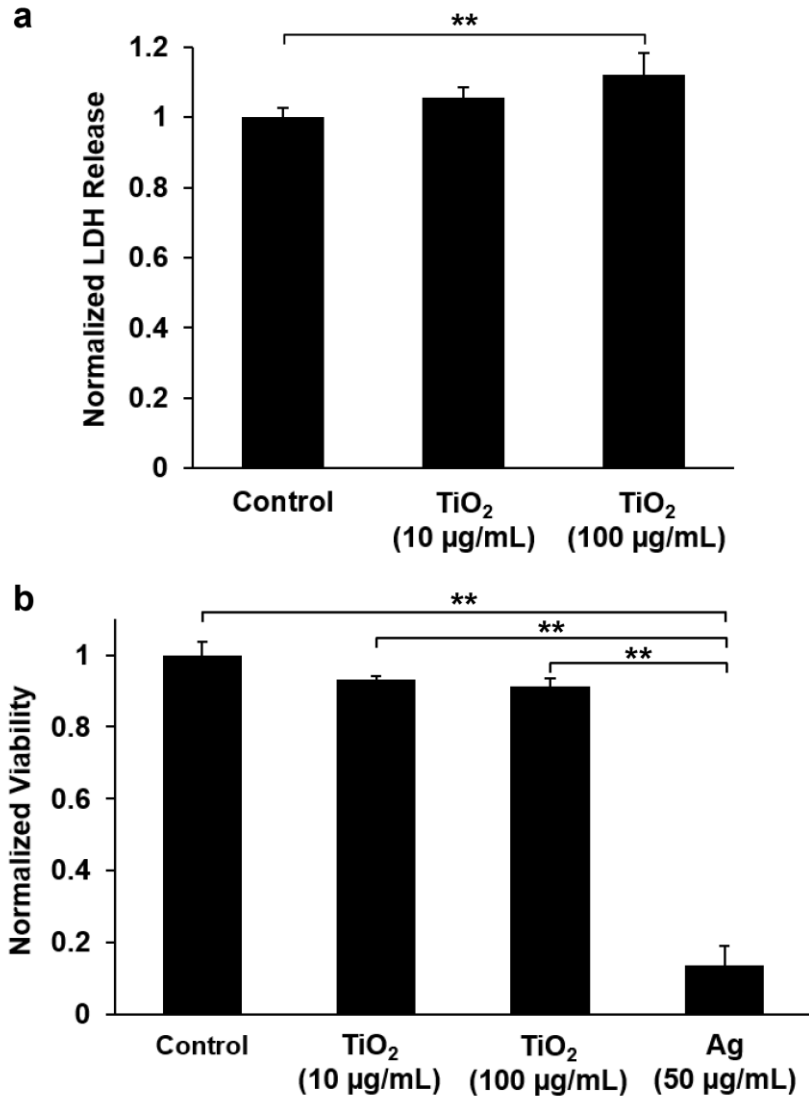

1  
2 **Figure S7.** Cytotoxicity tests for cardiomyocytes cultured on fiber MTFs. a) Comparison of  
3 lactate dehydrogenase (LDH) release of cardiomyocyte MTFs, pre- and post-exposure to TiO<sub>2</sub> at  
4 10 and 100 µg/mL. b) Comparison of cell viability based on MTT assay for cardiomyocytes  
5 unexposed and exposed to 50 µg/mL Ag nanoparticles. Bars represent standard error, *n*=8 per  
6 condition for LDH assay, *n*=16 for MTT assay. For statistical comparison, \*\**p*<0.05.

7  
8  
9  
10  
11  
12  
13  
14  
15

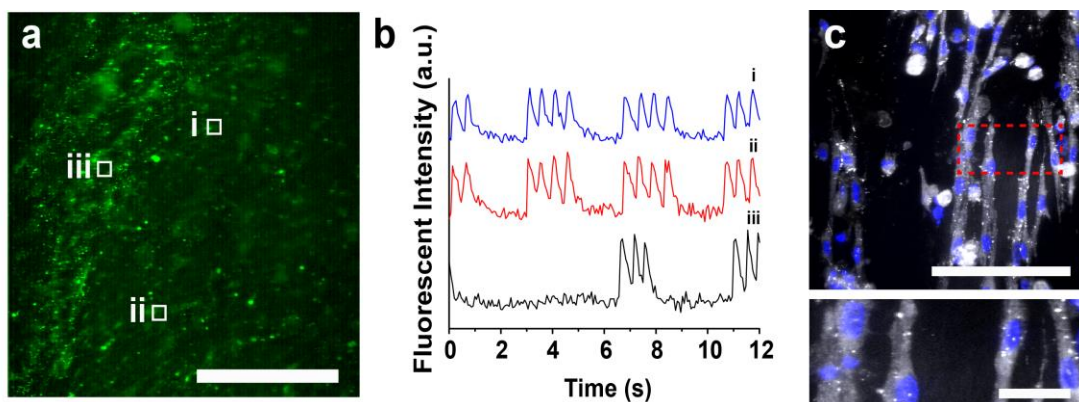

1  
2 **Figure S8.** Effect of silver nanoparticle exposure. a–b) Confocal images of calcium dye  
3 fluorescent (green) with calcium transient at the specific points (white boxes) for Ag (50  $\mu$ g/ml)  
4 exposure. Scale is 500  $\mu$ m. c) Confocal image of cardiomyocytes on nanofiber, stained for nuclei  
5 (blue) and  $\alpha$ -actinin (grey). Scales are 100  $\mu$ m (for the top panels) and 20  $\mu$ m (for the bottom  
6 panels). The bottom panels are the zoom-in images from the red dots of the top panels.

7  
8  
9  
10  
11  
12  
13  
14  
15  
16  
17  
18  
19  
20  
21  
22  
23  
24  
25  
26



1 **Table S1.** Morphological and structural properties of ENMs

| ENM                       | Primary Particle Size      |                       |                       | Crystal Structure                    |                                     |                   |
|---------------------------|----------------------------|-----------------------|-----------------------|--------------------------------------|-------------------------------------|-------------------|
|                           | SSA<br>(m <sup>2</sup> /g) | d <sub>BET</sub> (nm) | d <sub>TEM</sub> (nm) | d <sub>XRD</sub> (nm)                | Crystal System                      | Crystallinity (%) |
| TiO <sub>2</sub> P25      | 46.45 ±<br>2.32            | 29.76 ±<br>1.49       | 28.82 ±<br>11.07      | Anatase:<br>21.3<br>Rutile:<br>30.40 | Anatase<br>81.4%<br>Rutile<br>16.2% | 81.4              |
| Ag –<br>citrate<br>capped | N/A                        | N/A                   | 21.58 ±<br>2.83       | N/A                                  | N/A                                 | N/A               |

2 ENM, engineered nanomaterial; SSA by nitrogen adsorption/Brunauer-Emmett-Teller (BET)  
 3 method; d<sub>BET</sub>, d<sub>TEM</sub> and d<sub>XRD</sub>, particle  
 4  
 5  
 6  
 7  
 8  
 9  
 10  
 11  
 12  
 13  
 14  
 15  
 16  
 17  
 18  
 19  
 20  
 21  
 22  
 23  
 24  
 25  
 26  
 27  
 28  
 29  
 30  
 31  
 32  
 33  
 34  
 35

1 **Table S2.** Physical properties of ENMs

| ENM                       | Shape Factors    |                  |                  | Porosity   |                       | $\rho_{\text{raw}}$<br>(g/cc) |
|---------------------------|------------------|------------------|------------------|------------|-----------------------|-------------------------------|
|                           | Aspect ratio     | Circularity      | Roundness        | TPV (cc/g) | APS <sup>§</sup> (nm) |                               |
| TiO <sub>2</sub> P25      | 1.276 ±<br>0.162 | 0.926 ±<br>0.034 | 0.795 ±<br>0.094 | 0.119      | 5.14                  | 4.38±0.01                     |
| Ag –<br>citrate<br>capped | 1.175 ±<br>0.111 | 0.999 ±<br>0.025 | 0.858 ±<br>0.078 | N/A        | N/A                   | N/A                           |

2 ENM, engineered nanomaterial; TPV and APS, total pore volume and average pore size,  
 3 respectively determined by nitrogen adsorption/Brunauer-Emmett-Teller (BET) method;  $\rho_{\text{raw}}$ , the  
 4 raw density of ENMs determined by nitrogen volume displacement (pycnometry); <sup>§</sup>TEM did not  
 5 confirm the presence of pores but interparticle spacing instead.  
 6

7  
8  
9  
10  
11  
12  
13  
14  
15  
16  
17  
18  
19  
20  
21

1 **Table S3.** Chemical and biological properties of ENMs

| ENM                  | Chemical Elemental Composition |                                 |                     |                      | Recombinant Factor C (EU/mg) <sup>‡</sup> | Sterility (bacterial growth observed) <sup>†</sup> |
|----------------------|--------------------------------|---------------------------------|---------------------|----------------------|-------------------------------------------|----------------------------------------------------|
|                      | Trace Metal Analysis (%)       | Carbon Content (%) <sup>*</sup> | Stoichiometry XPS   | Stoichiometry ICP-MS |                                           |                                                    |
| TiO <sub>2</sub> P25 | 99.98±4.86 Ti                  | 0.22±0.13                       | TiO <sub>1.93</sub> | TiO <sub>1.86</sub>  | < LOD                                     | No growth                                          |
| Ag – citrate capped  | 99.69±0.60 Ag                  | 0.17±0.21                       | N/A                 | N/A                  | 4.870                                     | No growth                                          |

2 ENM, engineered nanomaterial; LOD, limit of detection; <sup>\*</sup>Elemental plus organic carbon content  
 3 (w/w); <sup>‡</sup>Suspension tested at 10 µg/ml, endotoxins in PBS is 76 EU/ml; <sup>†</sup>suspension tested at  
 4 50µg/ml;

5  
6  
7  
8  
9  
10  
11  
12  
13  
14  
15  
16  
17  
18  
19  
20  
21  
22  
23  
24  
25  
26  
27  
28  
29  
30  
31  
32  
33  
34  
35

1 **Table S4.** Percentage of cantilevers beating during the time point of MPS optical recording.

| <b>Condition</b>                         | <b>% Cantilevers Beating</b> |
|------------------------------------------|------------------------------|
| Control (0 $\mu\text{g/mL}$ )            | 95.0%                        |
| TiO <sub>2</sub> (10 $\mu\text{g/mL}$ )  | 91.7%                        |
| TiO <sub>2</sub> (100 $\mu\text{g/mL}$ ) | 55.6%                        |
| Ag (50 $\mu\text{g/mL}$ )                | 28.6%                        |

2  
3  
4  
5  
6  
7  
8  
9  
10  
11  
12  
13  
14  
15  
16  
17  
18  
19  
20  
21  
22  
23  
24  
25  
26  
27  
28

1 **Supplementary Movies**

2

3 **Movie 1.** NRVM contraction on PCL/PDA nanofiber scaffolds. Scale is 100  $\mu\text{m}$ .

4

5 **Movie 2.** NRVM contraction on fiber-coated gelatin MPS. Scale is 2 mm.

6

7 **Movie 3.** NRVM contraction on fiber-coated cardiac microphysiological device with embedded  
8 contractility sensors.

9

10 **Movie 4.** Time-series images of a calcium-sensitive dye from cardiomyocytes grown on the  
11 fiber-coated MTF sample without nanoparticle exposure.

12

13 **Movie 5.** Time-series images of a calcium-sensitive dye from cardiomyocytes grown on the  
14 fiber-coated MTF sample with a low-dose  $\text{TiO}_2$  (10  $\mu\text{g}/\text{ml}$ ) nanoparticle exposure.

15

16 **Movie 6.** Time-series images of a calcium-sensitive dye from cardiomyocytes grown on the  
17 fiber-coated MTF sample with a high-dose  $\text{TiO}_2$  (100  $\mu\text{g}/\text{ml}$ ) nanoparticle exposure.

18

19
